CORRECTION

# Correction: Validation of the Amsterdam Dynamic Facial Expression Set – Bath Intensity Variations (ADFES-BIV): A Set of Videos Expressing Low, Intermediate, and High Intensity Emotions

Tanja S. H. Wingenbach, Chris Ashwin, Mark Brosnan

The email address of the corresponding author, Tanja S. H. Wingenbach is incorrect. The correct email address to reach the corresponding author is [tanja.wingenbach@bath.edu](mailto:tanja.wingenbach@bath.edu).

The data availability statement is also incorrect. Please see the correct Data Availability Statement here: Some restrictions to data apply. Due to legal restrictions, the ADFES-BIV video set must be made available upon request to the corresponding author, Dr. Tanja Wingenbach ([tanja.wingenbach@bath.edu](mailto:tanja.wingenbach@bath.edu)). All other data are available within the paper and supporting information files.

## Reference

1. Wingenbach TSH, Ashwin C, Brosnan M (2016) Validation of the Amsterdam Dynamic Facial Expression Set – Bath Intensity Variations (ADFES-BIV): A Set of Videos Expressing Low, Intermediate, and High Intensity Emotions. PLoS ONE 11(1): e0147112. doi:[10.1371/journal.pone.0147112](https://doi.org/10.1371/journal.pone.0147112) PMID: [26784347](https://pubmed.ncbi.nlm.nih.gov/26784347/)

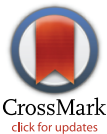

## OPEN ACCESS

**Citation:** Wingenbach TSH, Ashwin C, Brosnan M (2016) Correction: Validation of the Amsterdam Dynamic Facial Expression Set – Bath Intensity Variations (ADFES-BIV): A Set of Videos Expressing Low, Intermediate, and High Intensity Emotions. PLoS ONE 11(12): e0168891. doi:[10.1371/journal.pone.0168891](https://doi.org/10.1371/journal.pone.0168891)

**Published:** December 15, 2016

**Copyright:** © 2016 Wingenbach et al. This is an open access article distributed under the terms of the [Creative Commons Attribution License](https://creativecommons.org/licenses/by/4.0/), which permits unrestricted use, distribution, and reproduction in any medium, provided the original author and source are credited.
